# Supplementary material for: Development of a novel FePt-based multifunctional ferroptosis agent for high-efficiency anticancer therapy
Source: Royal Society of Chemistry journal article supplement (doi:10.1039/c8nr05150j), 2018-01-01
Supplement: c8nr05150j1.pdf [file c8nr05150j1.pdf]

**Supporting information for:**

**Development of A Novel FePt-Based Multifunctional Ferroptosis Agent for High-Efficiency Anticancer Therapy**

Ludan Yue<sup>‡a</sup>, Zhichao Dai<sup>‡a</sup>, Xue Chen<sup>a,b</sup>, Chunmiao Liu<sup>a,c</sup>, Zunfu Hu<sup>d</sup>, Bo Song<sup>e</sup>, Xiuwen Zheng<sup>a\*</sup>

<sup>a</sup>Key Laboratory of Functional Nanomaterials and Technology in Universities of Shandong, School of Chemistry and Chemical Engineering, Linyi University, Linyi 276000, China

<sup>b</sup>College of Chemistry, Chemical Engineering and Materials Science, Shandong Normal University, Jinan 250000, Shandong, China

<sup>c</sup>School of Chemistry and Chemical Engineering, Qingdao University, Qingdao 266000, Shandong, China

<sup>d</sup>College of Chemistry and Molecular Engineering, Qingdao University of Science and Technology, Qingdao 266000, Shandong, China

<sup>e</sup>State Key Laboratory of Fine Chemicals, School of Chemistry, Dalian University of Technology, Dalian 116024, China

\*Corresponding author.

Tel./Fax: +86-0539-7258151

E-mail: zhengxiuwen@lyu.edu.cn

<sup>‡</sup> Equal contribution to this work

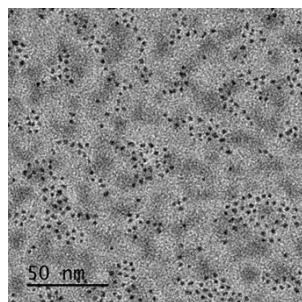

**Figure S1.** TEM images of FePt NPs.

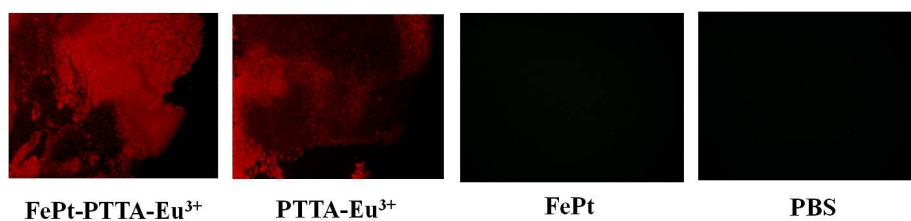

**Figure S2.** Time-gated luminescence imaging of the tumor slice treated with FPEF NPs, PTTA-Eu<sup>3+</sup>, FePt NPs and PBS.

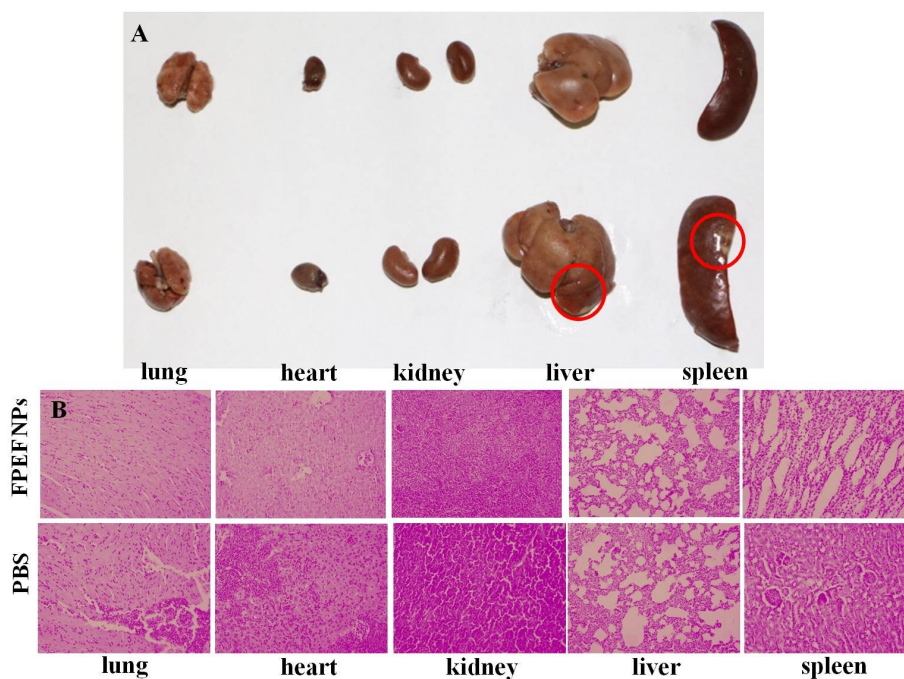

**Figure S3.** Bright (A) and H&E assay (B) images of organs from the balb/c mice treated with FPEF NPs and PBS.
